# Supplementary material
Source: PubMed Central journal article supplement (PMC8900288)
Supplement: web_material_mxab007.pdf [file web_material_mxab007.pdf]

# **Assumptions not often assessed or satisfied in published mediation analyses in psychology and psychiatry**

Elizabeth A. Stuart,<sup>1</sup> Ian Schmid<sup>1</sup>, Trang Nguyen<sup>1</sup>, Elizabeth Sarker<sup>2</sup>, Adam Pittman<sup>3</sup>, Kelly Benke, Kara Rudolph, Elena Badillo-Goicoechea, and Jeannie-Marie Leoutsakos

Author affiliations: Department of Mental Health, Johns Hopkins Bloomberg School of Public Health (Elizabeth A. Stuart, Ian Schmid, Trang Nguyen, Elena Badillo-Goicoechea, Kelly Benke); Department of Biostatistics, Johns Hopkins Bloomberg School of Public Health (Adam Pittman, Elizabeth Sarker); Department of Epidemiology, Columbia University (Kara Rudolph); Department of Psychiatry and Behavioral Sciences, Johns Hopkins School of Medicine (Jeannie-Marie Leoutsakos).

## **Contents**

**Web Table 1**

**Web Table 2**

**Web Table 1:** Count of articles from each journal

| <b>Journal*</b>                                                    | <b>No. Articles</b> |
|--------------------------------------------------------------------|---------------------|
| American Journal of Psychiatry                                     | 3                   |
| Biological Psychiatry                                              | 4                   |
| British Journal of Psychiatry                                      | 2                   |
| Child Development                                                  | 4                   |
| Developmental Psychology                                           | 8                   |
| Frontiers in Human Neuroscience                                    | 3                   |
| Frontiers in Psychology                                            | 48                  |
| JAMA Psychiatry                                                    | 2                   |
| Journal of Affective Disorders                                     | 46                  |
| Journal of Applied Psychology                                      | 6                   |
| Journal of Child Psychology and Psychiatry                         | 6                   |
| Journal of Consulting and Clinical Psychology                      | 12                  |
| Journal of Personality and Social Psychology                       | 10                  |
| Journal of Psychiatric Research                                    | 11                  |
| Journal of the American Academy of Child and Adolescent Psychiatry | 3                   |
| Molecular Psychiatry                                               | 1                   |
| Neuropsychopharmacology                                            | 5                   |
| Psychological Medicine                                             | 14                  |
| Psychological Science                                              | 5                   |
| Schizophrenia Bulletin                                             | 3                   |
| Schizophrenia Research                                             | 10                  |

\* The total number of journals is 23 because there were two journals that overlap between the Psychology and Psychiatry ranking lists, and five journals did not have any mediation analysis articles.

Web Table 2: Main results stratified by journal field. P-value tests for difference between fields

| <b>Study Characteristic</b>                                                    | <b>Psychiatry</b> | <b>Psychology</b> | <b>p-value</b> |
|--------------------------------------------------------------------------------|-------------------|-------------------|----------------|
| Temporal ordering of exposure and mediator                                     | 42.9              | 44.2              | 0.96           |
| Temporal ordering of mediator and outcome                                      | 26.1              | 36                | 0.17           |
| Temporal ordering of exposure, mediator and outcome                            | 21                | 25.6              | 0.55           |
| Adjusts for covariates                                                         | 63                | 57                | 0.47           |
| Covariates adjusted for include baseline measure of mediator                   | 14.3              | 12.8              | 0.92           |
| Covariates adjusted for include baseline measure of outcome                    | 18.5              | 12.8              | 0.36           |
| Covariates adjusted for include baseline measures of both mediator and outcome | 12.6              | 10.5              | 0.80           |
| Discuss mediation assumptions at all                                           | 41.2              | 43                | 0.90           |
| Examine interaction of exposure and mediator                                   | 1.8               | 3.5               | 0.75           |
| Performs sensitivity analysis to mediation assumptions                         | 1.7               | 2.3               | 1              |
